# Supplementary material for: Assessing the Effectiveness of a Multicomponent Intervention on Hand Hygiene and Well-Being in Primary Health Care Centers and Schools Lacking Functional Water Supply in Protracted Conflict Settings: Protocol for a Cluster Randomized Controlled Trial
Source: PubMed Central journal article supplement (PMC11024751; doi:10.2196/52959), 2024-04-03
Supplement: resprot_v13i1e52959_app1.pdf [file resprot_v13i1e52959_app1.pdf]

## Appendix

### 1. The hands4health consortium

**Table 1:** H4h consortium members presented alphabetically with their project responsibilities

| Partner name                                                                                                                    | Main function                             | Project responsibilities                                                                                                                                                                                                                                                                                    |
|---------------------------------------------------------------------------------------------------------------------------------|-------------------------------------------|-------------------------------------------------------------------------------------------------------------------------------------------------------------------------------------------------------------------------------------------------------------------------------------------------------------|
| <b>Academia</b>                                                                                                                 |                                           |                                                                                                                                                                                                                                                                                                             |
| Ecole Polytechnique Fédérale de Lausanne (EPFL)<br><a href="https://www.epfl.ch/labs/ltqe/">https://www.epfl.ch/labs/ltqe/</a>  | Research partner                          | <ul style="list-style-type: none"> <li>- Assessment of disinfectant stability in handwashing water</li> <li>- Passive release disinfection technology</li> <li>- Integration of disinfection in handwashing systems</li> </ul>                                                                              |
| Palestine Polytechnic University (PPU)<br><a href="https://www.ppu.edu/p/">https://www.ppu.edu/p/</a>                           | Research partner                          | <ul style="list-style-type: none"> <li>- Technology evaluation and choice for local context</li> <li>- Water quality analysis</li> <li>- User-centered design evaluation</li> <li>- Data collection, analysis and quality control</li> </ul>                                                                |
| Swiss Tropical and Public Health Institute (Swiss TPH)<br><a href="https://www.swisstph.ch/en/">https://www.swisstph.ch/en/</a> | Research partner                          | <ul style="list-style-type: none"> <li>- Public health and impact evaluation expertise</li> <li>- Methodology development and implementation of impact evaluation</li> <li>- Technical inputs for the overall project approach</li> <li>- Capacity development</li> <li>- Stakeholder engagement</li> </ul> |
| University of Applied Sciences and Arts Northwestern Switzerland (FHNW)                                                         | Research and project coordination partner | <ul style="list-style-type: none"> <li>- Overall project management and coordination</li> <li>- Engineering and design expertise (Gravit'eau)</li> <li>- Methods development for performance and user acceptance evaluation</li> <li>- Scale up strategy</li> </ul>                                         |

|                                                                                                                             |                              |                                                                                                                                                                                                                                                                                                                                                                                                                                                                   |
|-----------------------------------------------------------------------------------------------------------------------------|------------------------------|-------------------------------------------------------------------------------------------------------------------------------------------------------------------------------------------------------------------------------------------------------------------------------------------------------------------------------------------------------------------------------------------------------------------------------------------------------------------|
| <a href="https://www.fhnw.ch/en/about-fhnw/schools/lifesciences">https://www.fhnw.ch/en/about-fhnw/schools/lifesciences</a> |                              | <ul style="list-style-type: none"> <li>- Capacity development</li> <li>- Data analysis</li> <li>- Stakeholder engagement</li> <li>- Dissemination strategy</li> </ul>                                                                                                                                                                                                                                                                                             |
| University of Maiduguri (UNIMAID)<br><a href="https://www.unimaid.edu.ng/">https://www.unimaid.edu.ng/</a>                  | Research partner             | <ul style="list-style-type: none"> <li>- Local regulatory framework analysis</li> <li>- Stakeholder engagement</li> </ul>                                                                                                                                                                                                                                                                                                                                         |
| <b>Humanitarian organizations</b>                                                                                           |                              |                                                                                                                                                                                                                                                                                                                                                                                                                                                                   |
| Cesvi<br><a href="https://www.cesvi.eu/">https://www.cesvi.eu/</a>                                                          | Implementation partner       | <ul style="list-style-type: none"> <li>- Lead organization in Palestine</li> <li>- Local market assessment</li> <li>- Management of local supply chain and logistics</li> <li>- Coordination and evaluation of innovations</li> <li>- Data collection</li> <li>- User-centered design</li> <li>- Behavior change implementation and evaluation</li> <li>- Scale up and diffusion strategies</li> <li>- Capacity development and stakeholder engagement</li> </ul> |
| Skat Foundation<br><a href="https://skat-foundation.ch/">https://skat-foundation.ch/</a>                                    | Project coordination partner | <ul style="list-style-type: none"> <li>- Knowledge management through documenting and sharing information</li> <li>- Facilitation of learning process and training</li> <li>- Development of online platform</li> <li>- Co-development of scale-up and diffusion strategies</li> </ul>                                                                                                                                                                            |
| Terre des hommes (Tdh)<br><a href="https://www.tdh.org/en">https://www.tdh.org/en</a>                                       | Implementation partner       | <ul style="list-style-type: none"> <li>- Lead organization in Burkina Faso, Mali and Nigeria</li> <li>- Coordination and evaluation of innovations</li> <li>- Local market assessment</li> <li>- Management of local supply chain and logistics</li> <li>- Data collection</li> <li>- User-centered design</li> <li>- Behavior change implementation and evaluation</li> </ul>                                                                                    |

|                                                                                                                       |                                    |                                                                                                                                                                                                                                                                                                           |
|-----------------------------------------------------------------------------------------------------------------------|------------------------------------|-----------------------------------------------------------------------------------------------------------------------------------------------------------------------------------------------------------------------------------------------------------------------------------------------------------|
|                                                                                                                       |                                    | <ul style="list-style-type: none"> <li>- Scale up and diffusion strategies</li> <li>- Capacity development and stakeholder engagement</li> </ul>                                                                                                                                                          |
| <b>Private sector</b>                                                                                                 |                                    |                                                                                                                                                                                                                                                                                                           |
|                                                                                                                       |                                    |                                                                                                                                                                                                                                                                                                           |
| <p>Martin Systems GmbH</p> <p><a href="https://www.martin-membrane.de/en/">https://www.martin-membrane.de/en/</a></p> | <p>Hardware supply partner</p>     | <ul style="list-style-type: none"> <li>- Ultrafiltration module manufacturer</li> <li>- Optimization of modules</li> <li>- Quality control and production</li> <li>- Development of interface and business strategy</li> </ul>                                                                            |
| <p>Ranas</p> <p><a href="https://ranas.ch/">https://ranas.ch/</a></p>                                                 | <p>Behavior change specialists</p> | <ul style="list-style-type: none"> <li>- Leading partner for behavior change</li> <li>- Assessment of motivators and barriers for uptake of hand hygiene innovations</li> <li>- Development of behavior change campaign design tool-kit</li> <li>- Training and certification of RANAS experts</li> </ul> |
