# Supplementary material for: Assessing the Effectiveness of a Multicomponent Intervention on Hand Hygiene and Well-Being in Primary Health Care Centers and Schools Lacking Functional Water Supply in Protracted Conflict Settings: Protocol for a Cluster Randomized Controlled Trial
Source: PubMed Central journal article supplement (PMC11024751; doi:10.2196/52959), 2024-04-03
Supplement: resprot_v13i1e52959_app4.pdf [file resprot_v13i1e52959_app4.pdf]

#### 4. Details of hygiene-related absenteeism and health conditions

Table 1: Hygiene-related absenteeism and health condition variables recorded in 24 primary health care facilities, respectively 26 schools per country for Module 4.

|                                         |                                                                                                                                                                            |                                                                                                                                       |
|-----------------------------------------|----------------------------------------------------------------------------------------------------------------------------------------------------------------------------|---------------------------------------------------------------------------------------------------------------------------------------|
| <b>Health care workers and students</b> | Hygiene-related absenteeism (ie. Diarrhea, cold, influenza, COVID-19, respiratory problems, eye infections, skin infections, HIV/AIDS, hepatitis B or C, other infections) | Record of the event, Number of days absent, Reason for absence, The availability of a medical report for a student's absence instance |
| <b>Patients</b>                         | Maternal mortality                                                                                                                                                         | Record of the event, If known, reason for passing                                                                                     |
| <b>Patients</b>                         | Postpartum endometritis                                                                                                                                                    | Record of the event, Number of days treated, Outcome (healthy, unknown, death)                                                        |
| <b>Patients</b>                         | Stillbirths                                                                                                                                                                | Record of the event, If known, reason for passing                                                                                     |
| <b>Patients</b>                         | Neonatal mortality                                                                                                                                                         | Record of the event, If known, reason for passing                                                                                     |
| <b>Patients</b>                         | Neonatal sepsis[59]                                                                                                                                                        | Record of the event, Number of days treated, Outcome (healthy, unknown, death)                                                        |
| <b>Patients</b>                         | Umbilical cord infection                                                                                                                                                   | Record of the event, Number of days treated, Type of infection, Outcome (healthy, unknown, death)                                     |
| <b>Patients</b>                         | Wound infection after stitching of surgical procedures                                                                                                                     | Record of the event, Number of days treated, Outcome                                                                                  |
